# Supplementary material for: NopAA and NopD Signaling Association-Related Gene GmNAC27 Promotes Nodulation in Soybean (Glycine max)
Source: MDPI journal article supplement (doi:10.3390/ijms242417498), 2023-12-15
Supplement: s1 [file s1]

**Table S1.** Primers used in this study

| No. | Name of primer          | Sequence 5'-3'               | Annotation and Functions |
|-----|-------------------------|------------------------------|--------------------------|
| 1   | <i>qNIN</i>             | Fwd-GAAGGGTTTTGACGAGTTGTAC   | qRT-PCR                  |
|     |                         | Rev-TGTGAGAGCTAAAGGCAAGTTA   | qRT-PCR                  |
| 2   | <i>qENOD40</i>          | Fwd-TGGCTATGTAGTGCTCATGTAG   | qRT-PCR                  |
|     |                         | Rev-GCAAAAGCTGGTAACTTCTCAA   |                          |
| 3   | <i>qNSP1</i>            | Fwd-CACTGAATGCTCAAAGTGTTGA   | qRT-PCR                  |
|     |                         | Rev-GTTCCTCAACACTGTCAGAAAC   |                          |
| 4   | <i>qPR1</i>             | Fwd-GGCCAATACGGGGAGAATCT     | qRT-PCR                  |
|     |                         | Rev-TCCAAACAACCTGAGTGTAATGC  |                          |
| 5   | <i>qPR2</i>             | Fwd-TGAGAGTGGATGGCCTTCTT     | qRT-PCR                  |
|     |                         | Rev-TGTTTCACATTCCGAACCAA     |                          |
| 6   | <i>qPR5</i>             | Fwd-AACGTGCCCATGGACTTTAG     | qRT-PCR                  |
|     |                         | Rev-CGGTTTTGAAGACAGTGCAA     |                          |
| 7   | <i>qGlyma.13G279900</i> | Fwd-GAGCTTCTCGTTCAGTATCTGT   | qRT-PCR                  |
|     |                         | Rev-CTTGTACAAGTCAATTTCTGGCA  |                          |
| 8   | <i>qGlyma.04G118900</i> | Fwd-CTCTCAAGCTATGCAATGTGTC   | qRT-PCR                  |
|     |                         | Rev-TCACATTCCCAAAGCAATCTTG   |                          |
| 9   | <i>qGlyma.06G193800</i> | Fwd-CTGCTACAACAACCTGGAAGAAC  | qRT-PCR                  |
|     |                         | Rev-TTGACTAATCAGGAGAACACCC   |                          |
| 10  | <i>qGlyma.02G204700</i> | Fwd-CCCGAAATATTGACATGTAACACG | qRT-PCR                  |
|     |                         | Rev-TTGAAAAATTGACACCCTAGCC   |                          |
| 11  | <i>qGlyma.15G071200</i> | Fwd-TGCCAAAGAAATCTCAACGAAG   | qRT-PCR                  |
|     |                         | Rev-CTTTCAACGAGAGCAGAAACAA   |                          |
| 12  | <i>qGlyma.16G015300</i> | Fwd-GTCGTGGCTTTACTTTCTTTT    | qRT-PCR                  |
|     |                         | Rev-TCAACTGAATGCAACTGTTCAC   |                          |

|    |                         |                                                           |                                                                 |
|----|-------------------------|-----------------------------------------------------------|-----------------------------------------------------------------|
| 13 | <i>qGlyma.05G082400</i> | Fwd-GCTTCCATGAATCTGGCTAATG<br>Rev-TATTTGACAGTACGCGGATCAT  | qRT-PCR                                                         |
| 14 | <i>qGlyma.15G217300</i> | Fwd-ATACCACAGTGTGTTTTGGAGT<br>Rev-CTATCAAGCAGCACAAAGACAAG | qRT-PCR                                                         |
| 15 | <i>qGlyma.09G163900</i> | Fwd-AGCACTTCCTTTCATTTGGTTC<br>Rev-GCTGCACTAATTTTCGTTAACCA | qRT-PCR                                                         |
| 16 | <i>qGlyma.17G067800</i> | Fwd-CTTCTGGAAGTGGATGAGAGTT<br>Rev-TTCTCATTTATCTCCCTCGCAA  | qRT-PCR                                                         |
| 17 | <i>qGlyma.20G217100</i> | Fwd-TTTCAAATACCCTAATTCGCGC<br>Rev-GTACTTGGCGAAATGGAGAAAG  | qRT-PCR                                                         |
| 18 | <i>qGlyma.12G234700</i> | Fwd-GAGCTACCGTATGTCGATGTAT<br>Rev-TCTAATCTCTGAGTGGGATCCT  | qRT-PCR                                                         |
| 19 | <i>qGlyma.01G178500</i> | Fwd-AAAGAGTTGCATAACGTTCTCG<br>Rev-ATTCTCTTCTTACCGACTCGTG  | qRT-PCR                                                         |
| 20 | <i>qUKN1</i>            | Fwd-TGGTGCTG CCGCTATTTACTG<br>Rev-GGTGGAAGGAACTGCTAACAAT  | Reference gene for qRT-PCR                                      |
| 21 | <i>NAC27</i>            | Fwd-ATGGGAGTTCCAGAGAAAGA<br>Rev-ATTTCTGAACCCGAACCCG       | Clone <i>GmNAC27</i> fragment                                   |
| 22 | <i>RNAi-NAC27</i>       | Fwd-TCTTCCAAGTAAAGCGATTT<br>Rev- AAATCGCTTTACTTGGAAGA     | Clone <i>GmNAC27-RNAi</i> fragment into pGWC for gene silencing |

---

**Table S2.** Information of Strains and Vectors

| Strain                                                                                                                                                                    | Relevant characteristics                                                                                                                                                                    | Reference                                         |
|---------------------------------------------------------------------------------------------------------------------------------------------------------------------------|---------------------------------------------------------------------------------------------------------------------------------------------------------------------------------------------|---------------------------------------------------|
| <b><i>Escherichia coli</i></b>                                                                                                                                            |                                                                                                                                                                                             |                                                   |
| DH5 $\alpha$                                                                                                                                                              | supE44 lacY169 ( 80lacZM15) hsdR17 recA1 endA1 gyrA96 thi-1 relA1                                                                                                                           | Transgene (Transgene Biotech Co., Beijing, China) |
| <b><i>Agrobacterium rhizogenes</i></b>                                                                                                                                    |                                                                                                                                                                                             |                                                   |
| EHA105                                                                                                                                                                    | C58 (rif <sup>r</sup> ) Ti pEHA105 (pTiBo542DT-DNA) (strep <sup>r</sup> ) Succinamopine                                                                                                     | Transgene (Transgene Biotech Co., Beijing, China) |
| K599                                                                                                                                                                      | pRi2659 agrobacterium-type Ri plasmid, Strep <sup>r</sup>                                                                                                                                   | Beyotime (Beyotime Biotech Co., Shanghai, China)  |
| <b><i>Rhizobium</i> strains</b>                                                                                                                                           |                                                                                                                                                                                             |                                                   |
| HH103                                                                                                                                                                     | Broad host range bacterium isolated from nodules of Glycine max , Rif <sup>r</sup>                                                                                                          | Wang J, Wang J et al <sup>[1]</sup>               |
| HH103 $\Omega$ NopAA                                                                                                                                                      | HH103 insertion mutated containing an Kanamycin resistance gene insertion at position downstream 17bp of start codon of NopAA nucleotide sequence, Rif <sup>r</sup> , Kan <sup>r</sup>      | Wang J, Ma C et al <sup>[1]</sup>                 |
| HH103 $\Omega$ NopD                                                                                                                                                       | HH103 insertion mutated containing an Kanamycin resistance gene insertion at position downstream 9bp of start codon of <i>NopD</i> nucleotide sequence, Rif <sup>r</sup> , Kan <sup>r</sup> | Wang J, Wang J et al <sup>[1]</sup>               |
| HH103 $\Omega$ NopAA&D                                                                                                                                                    | HH103 $\Omega$ NopAA insertion mutated containing an spectinomycin resistance gene insertion at <i>NopD</i> nucleotide sequence, Rif <sup>r</sup> , Kan <sup>r</sup> , Spec <sup>r</sup>    | This work                                         |
| HH103 $\Omega$ TtsI                                                                                                                                                       | HH103 insertion mutated containing a Kanamycin resistance gene insertion at position downstream 8bp of start codon of <i>TtsI</i> nucleotide sequence, Rif <sup>r</sup> , Kan <sup>r</sup>  | Wang J, Wang J et al <sup>[1]</sup>               |
| <b>Plasmids</b>                                                                                                                                                           |                                                                                                                                                                                             |                                                   |
| pGWC                                                                                                                                                                      | Entry clone vector, Cm <sup>r</sup>                                                                                                                                                         | Wang J, Wang J et al <sup>[1]</sup>               |
| Note: Rifampicin (Rif <sup>r</sup> ) Kanamycin (Kan <sup>r</sup> ) Chloramphenicol (Cm <sup>r</sup> ) Spectinomycin(Spec <sup>r</sup> ) Streptomycin(Strep <sup>r</sup> ) |                                                                                                                                                                                             |                                                   |

References cited in Table S2

- [1] Wang J, Wang J, Ma C, Zhou Z, Yang D, Zheng J, Wang Q, Li H, Zhou H, Sun Z, Liu H, Li J, Chen L, Kang Q, Qi Z, Jiang H, Zhu R, Wu X, Liu C, Chen Q, Xin D. QTL Mapping and Data Mining to Identify Genes Associated With the *Sinorhizobium fredii* HH103 T3SS Effector NopD in Soybean. *Front Plant Sci.* 2020 May 19;11:453.

**Table S3.** The candidate genes annotation

| No. | Gene ID                | Annotations on phytozome                                              |
|-----|------------------------|-----------------------------------------------------------------------|
| 1   | <i>GLYMA.04G118900</i> | NONE                                                                  |
| 2   | <i>GLYMA.06G193800</i> | GIBBERELLIN-REGULATED PROTEIN 12-RELATED                              |
| 3   | <i>GLYMA.02G204700</i> | SERINE CARBOXYPEPTIDASE 24-RELATED                                    |
| 4   | <i>GLYMA.16G015300</i> | RNA RECOGNITION MOTIF RNP-1 DOMAIN-CONTAINING PROTEIN                 |
| 5   | <i>GLYMA.13G279900</i> | NAC DOMAIN-CONTAINING PROTEIN 19-RELATED                              |
| 6   | <i>GLYMA.15G071200</i> | CATECHOL OXIDASE / TYROSINASE                                         |
| 7   | <i>GLYMA.05G082400</i> | LEUCINE-RICH REPEAT-CONTAINING PROTEIN                                |
| 8   | <i>GLYMA.15G217300</i> | DNA-3-METHYLADENINE GLYCOSYLASE I / DNA-3-METHYLADENINE GLYCOSIDASE I |
| 9   | <i>GLYMA.09G163900</i> | TRYPSIN AND PROTEASE INHIBITOR                                        |
| 10  | <i>GLYMA.17G067800</i> | LPHA, ALPHA-TREHALOSE-PHOSPHATE SYNTHASE 11-RELATED                   |
| 11  | <i>GLYMA.20G217100</i> | PLASTOCYANIN-LIKE DOMAIN                                              |
| 12  | <i>GLYMA.12G234700</i> | TRYPSIN AND PROTEASE INHIBITOR                                        |
| 13  | <i>GLYMA.01G178500</i> | UNCHARACTERIZED CONSERVED PROTEIN                                     |
